# Supplementary material for: Characteristics and Use of Services Among Literally Homeless and Unstably Housed U.S. Veterans With Custody of Minor Children
Source: Atypon-hosted journal article supplement (doi:10.1176/appi.ps.201400300), 2015-05-15
Supplement: appi.ps.201400300.ds001.pdf [file appi.ps.201400300.ds001.pdf]

Supplementary Table 1. Male veterans with and without minor children under their study stratified by literally homeless or unstably housed

| <u>Literally homeless</u> male veterans |                                                           |      |                                                               |      |                                        |
|-----------------------------------------|-----------------------------------------------------------|------|---------------------------------------------------------------|------|----------------------------------------|
|                                         | <u>With</u> minor children<br>under custody<br>(n= 5,543) |      | <u>Without</u> minor children<br>under custody<br>(n= 58,039) |      | Test of<br>Difference<br>( $\Delta$ %) |
|                                         | N/Mean                                                    | %/SD | N/Mean                                                        | %/SD |                                        |
| Rating of physical health               |                                                           |      |                                                               |      |                                        |
| Poor                                    | 832                                                       | 15.2 | 9,929                                                         | 17.5 | -2.3                                   |
| Fair/Good                               | 3,649                                                     | 66.9 | 37,378                                                        | 66.0 | .9                                     |
| Very Good/Excellent                     | 976                                                       | 17.9 | 9,284                                                         | 16.4 | 1.5                                    |
| Chronic medical condition               |                                                           |      |                                                               |      |                                        |
| HIV/AIDS                                | 35                                                        | .6   | 1,065                                                         | 1.8  | -1.2                                   |
| Hepatitis C                             | 368                                                       | 6.6  | 9,238                                                         | 15.9 | <b>-9.3</b>                            |
| Tuberculosis                            | 186                                                       | 3.4  | 2,941                                                         | 5.1  | -1.7                                   |
| COPD <sup>a</sup>                       | 228                                                       | 4.1  | 5,224                                                         | 9.0  | -4.9                                   |
| Heart disease                           | 375                                                       | 6.8  | 6,482                                                         | 11.2 | -4.4                                   |
| Stroke                                  | 77                                                        | 2.0  | 1,662                                                         | 4.1  | -2.1                                   |
| Diabetes                                | 542                                                       | 9.8  | 7,462                                                         | 12.9 | -3.1                                   |
| Seizures                                | 234                                                       | 4.2  | 2,886                                                         | 5.0  | -.8                                    |
| Chronic pain                            | 2,279                                                     | 41.2 | 21,531                                                        | 37.1 | 4.1                                    |
| Psychiatric diagnoses                   |                                                           |      |                                                               |      |                                        |
| Any disorder                            | 4,066                                                     | 73.4 | 45,175                                                        | 77.8 | -4.4                                   |
| Psychotic disorder                      | 669                                                       | 12.1 | 8,937                                                         | 15.4 | -3.3                                   |
| Affective disorder                      | 2,130                                                     | 38.4 | 21,407                                                        | 36.9 | 1.5                                    |
| PTSD <sup>b</sup>                       | 1,669                                                     | 30.1 | 10,057                                                        | 17.3 | <b>12.8</b>                            |
| Anxiety disorder                        | 1,168                                                     | 21.1 | 9,331                                                         | 16.1 | 5.0                                    |
| Substance use disorder                  | 2,332                                                     | 42.1 | 33,587                                                        | 57.9 | <b>-15.8</b>                           |
| Any psychiatric hospitalizations        | 1,808                                                     | 33.1 | 21,393                                                        | 37.8 | -4.7                                   |
| <u>Unstably housed</u> male veterans    |                                                           |      |                                                               |      |                                        |
|                                         | <u>With</u> minor children<br>under custody<br>(n= 3,339) |      | <u>Without</u> minor children<br>under custody<br>(n= 15,564) |      | Test of<br>Difference<br>( $\Delta$ %) |
|                                         | N/Mean                                                    | %/SD | N/Mean                                                        | %/SD |                                        |
| Rating of physical health               |                                                           |      |                                                               |      |                                        |
| Poor                                    | 628                                                       | 19.2 | 2,973                                                         | 19.5 | -.3                                    |
| Fair/Good                               | 2,137                                                     | 65.2 | 10,167                                                        | 66.7 | -1.5                                   |
| Very Good/Excellent                     | 512                                                       | 15.6 | 2,114                                                         | 13.9 | 1.7                                    |
| Chronic medical condition               |                                                           |      |                                                               |      |                                        |
| HIV/AIDS                                | 19                                                        | .6   | 343                                                           | 2.2  | -1.6                                   |
| Hepatitis C                             | 171                                                       | 5.1  | 2,108                                                         | 13.6 | <b>-8.5</b>                            |
| Tuberculosis                            | 85                                                        | 2.5  | 602                                                           | 3.9  | -1.4                                   |

<sup>a</sup>COPD= Chronic obstructive pulmonary disease<sup>b</sup>PTSD= Posttraumatic stress disorder

|                                  |       |      |        |      |              |
|----------------------------------|-------|------|--------|------|--------------|
| COPD <sup>c</sup>                | 125   | 3.7  | 1,491  | 9.6  | <b>-5.9</b>  |
| Heart disease                    | 244   | 7.3  | 2,100  | 13.5 | <b>-6.2</b>  |
| Stroke                           | 60    | 2.6  | 534    | 4.8  | -2.2         |
| Diabetes                         | 340   | 10.2 | 2,418  | 15.6 | <b>-5.4</b>  |
| Seizures                         | 130   | 3.9  | 749    | 4.8  | -.9          |
| Chronic pain                     | 1,452 | 43.5 | 6,160  | 39.6 | 3.9          |
| Psychiatric diagnoses            |       |      |        |      |              |
| Any disorder                     | 2,315 | 69.3 | 11,486 | 73.8 | -4.5         |
| Psychotic disorder               | 291   | 8.7  | 2,062  | 13.2 | -4.5         |
| Affective disorder               | 1,272 | 38.1 | 5,707  | 36.7 | 1.4          |
| PTSD <sup>d</sup>                | 1,056 | 31.6 | 2,780  | 17.9 | <b>13.7</b>  |
| Anxiety disorder                 | 747   | 22.4 | 2,718  | 17.5 | 4.9          |
| Substance use disorder           | 1,058 | 31.7 | 7,482  | 48.1 | <b>-16.4</b> |
| Any psychiatric hospitalizations | 849   | 26.1 | 5,086  | 33.4 | <b>-7.3</b>  |

Note: Notable differences ( $\Delta > 5\%$ ) are bolded.

---

<sup>c</sup>COPD= Chronic obstructive pulmonary disease

<sup>d</sup>PTSD= Posttraumatic stress disorder

Supplementary Table 2. Female veterans with and without minor children under their study stratified by literally homeless or unstably housed

| <u>Literally homeless</u> female veterans |                                                     |      |                                                        |      |                         |
|-------------------------------------------|-----------------------------------------------------|------|--------------------------------------------------------|------|-------------------------|
|                                           | <u>With</u> minor children under custody (n= 1,513) |      | <u>Without</u> minor children under custody (n= 3,593) |      | Test of Difference (Δ%) |
|                                           | N/Mean                                              | %/SD | N/Mean                                                 | %/SD |                         |
| Rating of physical health                 |                                                     |      |                                                        |      |                         |
| Poor                                      | 197                                                 | 13.3 | 597                                                    | 17.0 | -3.7                    |
| Fair/Good                                 | 1,048                                               | 70.6 | 2,403                                                  | 68.4 | 2.2                     |
| Very Good/Excellent                       | 240                                                 | 16.2 | 513                                                    | 14.6 | 1.6                     |
| Chronic medical condition                 |                                                     |      |                                                        |      |                         |
| HIV/AIDS                                  | 9                                                   | .6   | 41                                                     | 1.1  | -.5                     |
| Hepatitis C                               | 24                                                  | 1.6  | 262                                                    | 7.3  | <b>-5.7</b>             |
| Tuberculosis                              | 31                                                  | 2.1  | 106                                                    | 3.0  | -.9                     |
| COPD <sup>a</sup>                         | 39                                                  | 2.6  | 261                                                    | 7.3  | -4.7                    |
| Heart disease                             | 54                                                  | 3.6  | 266                                                    | 7.4  | -3.8                    |
| Stroke                                    | 14                                                  | 1.4  | 89                                                     | 3.6  | -2.2                    |
| Diabetes                                  | 80                                                  | 5.3  | 364                                                    | 10.2 | -4.9                    |
| Seizures                                  | 57                                                  | 3.8  | 172                                                    | 4.8  | -1.0                    |
| Chronic pain                              | 504                                                 | 33.3 | 1,417                                                  | 39.5 | <b>-6.2</b>             |
| Psychiatric diagnoses                     |                                                     |      |                                                        |      |                         |
| Any disorder                              | 1,021                                               | 67.5 | 2,773                                                  | 77.2 | <b>-9.7</b>             |
| Psychotic disorder                        | 185                                                 | 12.2 | 739                                                    | 20.6 | <b>-8.4</b>             |
| Affective disorder                        | 659                                                 | 43.6 | 1,649                                                  | 45.9 | -2.3                    |
| PTSD <sup>b</sup>                         | 446                                                 | 29.5 | 1,183                                                  | 32.9 | -3.4                    |
| Anxiety disorder                          | 407                                                 | 26.9 | 952                                                    | 26.5 | .4                      |
| Substance use disorder                    | 279                                                 | 18.4 | 1,312                                                  | 36.5 | <b>-18.1</b>            |
| Any psychiatric hospitalizations          | 430                                                 | 29.1 | 1,608                                                  | 45.9 | <b>-16.8</b>            |
| <u>Unstably housed</u> female veterans    |                                                     |      |                                                        |      |                         |
|                                           | <u>With</u> minor children under custody (n= 1,382) |      | <u>Without</u> minor children under custody (n= 1,722) |      | Test of Difference (Δ%) |
|                                           | N/Mean                                              | %/SD | N/Mean                                                 | %/SD |                         |
| Rating of physical health                 |                                                     |      |                                                        |      |                         |
| Poor                                      | 209                                                 | 15.4 | 351                                                    | 20.8 | <b>-5.4</b>             |
| Fair/Good                                 | 958                                                 | 70.5 | 1,145                                                  | 67.9 | 2.6                     |
| Very Good/Excellent                       | 192                                                 | 14.1 | 191                                                    | 11.3 | 2.8                     |
| Chronic medical condition                 |                                                     |      |                                                        |      |                         |
| HIV/AIDS                                  | 4                                                   | .3   | 16                                                     | .9   | -.6                     |
| Hepatitis C                               | 17                                                  | 1.2  | 84                                                     | 4.9  | -3.7                    |
| Tuberculosis                              | 28                                                  | 2.0  | 37                                                     | 2.2  | -.2                     |

<sup>a</sup>COPD= Chronic obstructive pulmonary disease

<sup>b</sup>PTSD= Posttraumatic stress disorder

|                                  |     |      |       |      |              |
|----------------------------------|-----|------|-------|------|--------------|
| COPD <sup>c</sup>                | 26  | 1.9  | 103   | 6.0  | -4.1         |
| Heart disease                    | 50  | 3.6  | 136   | 7.9  | -4.3         |
| Stroke                           | 10  | 1.1  | 37    | 3.0  | -1.9         |
| Diabetes                         | 65  | 4.7  | 219   | 12.7 | <b>-8.0</b>  |
| Seizures                         | 46  | 3.3  | 70    | 4.1  | -0.8         |
| Chronic pain                     | 493 | 35.7 | 746   | 43.4 | <b>-7.7</b>  |
| Psychiatric diagnoses            |     |      |       |      |              |
| Any disorder                     | 912 | 66.0 | 1,291 | 75.0 | <b>-9.0</b>  |
| Psychotic disorder               | 141 | 10.2 | 304   | 17.7 | <b>-7.5</b>  |
| Affective disorder               | 586 | 42.4 | 808   | 46.9 | -4.5         |
| PTSD <sup>d</sup>                | 403 | 29.2 | 483   | 28.0 | 1.2          |
| Anxiety disorder                 | 354 | 25.6 | 451   | 26.2 | -0.6         |
| Substance use disorder           | 198 | 14.3 | 434   | 25.2 | <b>-10.9</b> |
| Any psychiatric hospitalizations | 319 | 23.7 | 647   | 38.6 | <b>-14.9</b> |

Note: Notable differences ( $\Delta > 5\%$ ) are bolded.

---

<sup>c</sup>COPD= Chronic obstructive pulmonary disease

<sup>d</sup>PTSD= Posttraumatic stress disorder
